# Supplementary material for: Enhanced Li-Ion Rate Capability and Stable Efficiency Enabled by MoSe2 Nanosheets in Polymer-Derived Silicon Oxycarbide Fiber Electrodes
Source: MDPI journal article supplement (doi:10.3390/nano12030553), 2022-02-06
Supplement: s1 [file s1]

## Supplementary Materials

# Enhanced Li-ion Rate Capability and Stable Efficiency Enabled by MoSe<sub>2</sub> Nanosheets in Polymer-derived Silicon Oxycarbide Fiber Electrodes

Sonjoy Dey \*, Shakir Bin Mujib \* and Gurpreet Singh

Department of Mechanical and Nuclear Engineering, Kansas State University, Manhattan, KS 66506, USA; gurpreet@ksu.edu

\* Correspondence: sonjoy@ksu.edu (S.D.); sbmujib@ksu.edu (S.B.M.); Tel.: +1-785-770-5891 (S.D.); +1-785-410-5023 (S.B.M.)

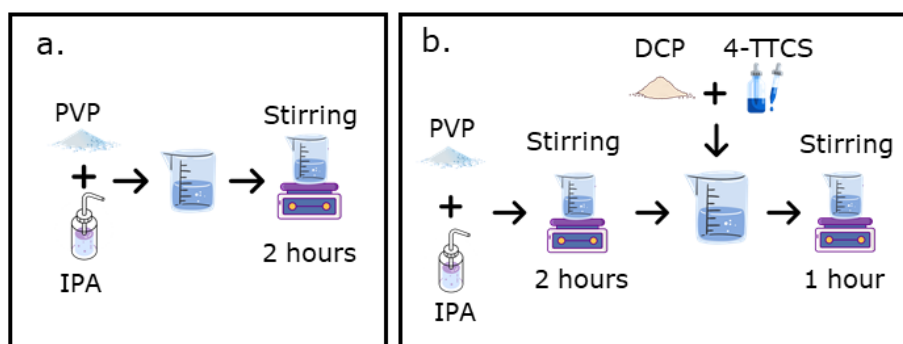

**Figure S1:** Solution preparation process of (a) PVP fiber and (b) PVP/SiOC fiber.

**Table S1:** Comparison of the electrochemical performance of the PVP/SiOC/MoSe<sub>2</sub> anode with previously studied SiOC anodes for LIBs.

| Materials                      | Current Density (mA g <sup>-1</sup> ) | Capacity (mAh g <sup>-1</sup> ) | References |
|--------------------------------|---------------------------------------|---------------------------------|------------|
| SiOC/MoSe <sub>2</sub>         | 50, 100                               | 586,393                         | This work  |
| SiOC                           | 37                                    | 540                             | [70]       |
| SiOC                           | 100                                   | 100                             | [71]       |
| N-doped RGO aerogels with SiOC | 148                                   | 565                             | [72]       |
| SiOC/Graphene                  | 50                                    | 582                             | [73]       |
| SiOC                           | 74                                    | 460                             | [74]       |
| SiOC                           | 36                                    | 150                             | [75]       |
| SiOC                           | 186                                   | 303                             | [58]       |
| SiOC etched with HF            | 18                                    | 457                             | [60]       |
| SiOC                           | 50                                    | 578                             | [60]       |
| SiOC                           | 50                                    | 243                             | [60]       |
| SiOC                           | 50                                    | 53                              | [60]       |
| SiOC                           | 18.6                                  | 568                             | [76]       |
| SiOC/Glucose                   | 37                                    | 201                             | [13]       |
| SiOC/Potato Starch             | 37                                    | 140                             | [13]       |
| SiOC/Potato Starch             | 37                                    | 44                              | [13]       |
